# Supplementary material
Source: MDPI journal article supplement (https://www.mdpi.com/2073-4433/9/3/112)

25 75 125 175 225 275

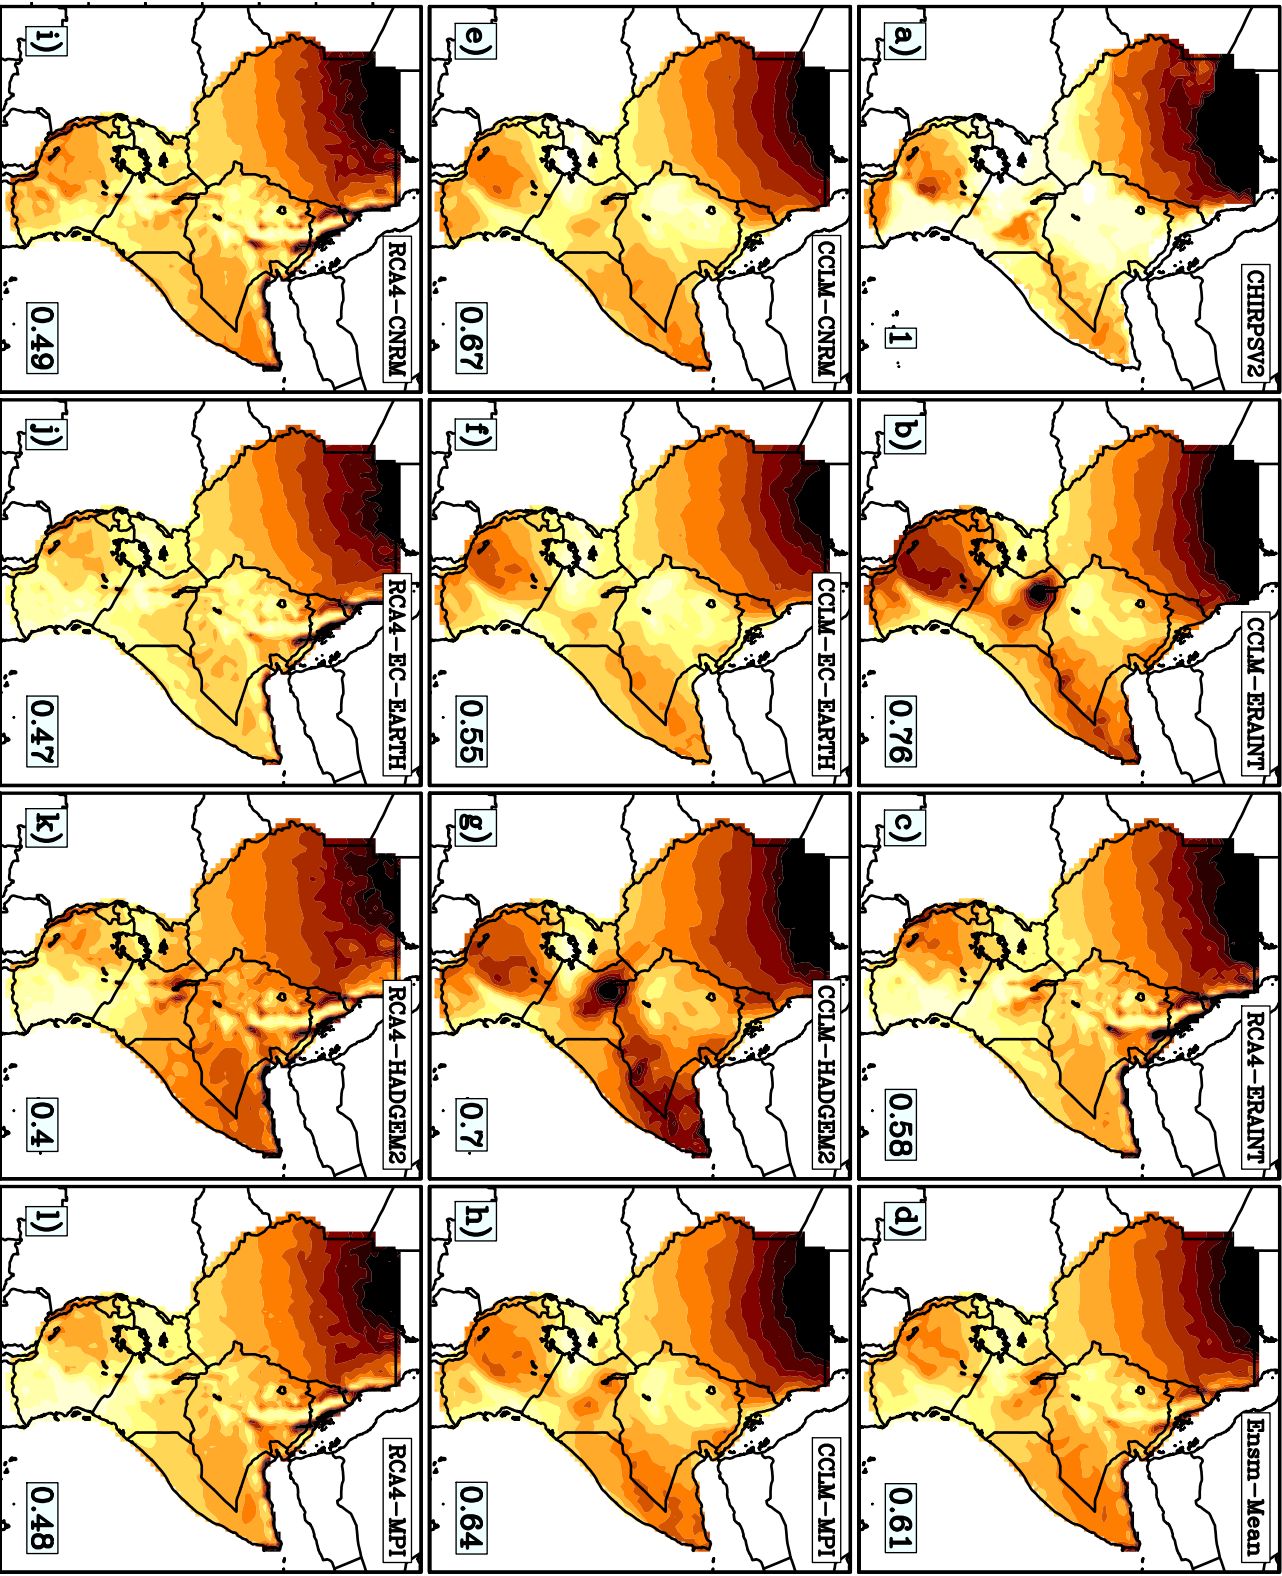

Supplement: s1 [file s1]

Member Agreement on sign of cdd change

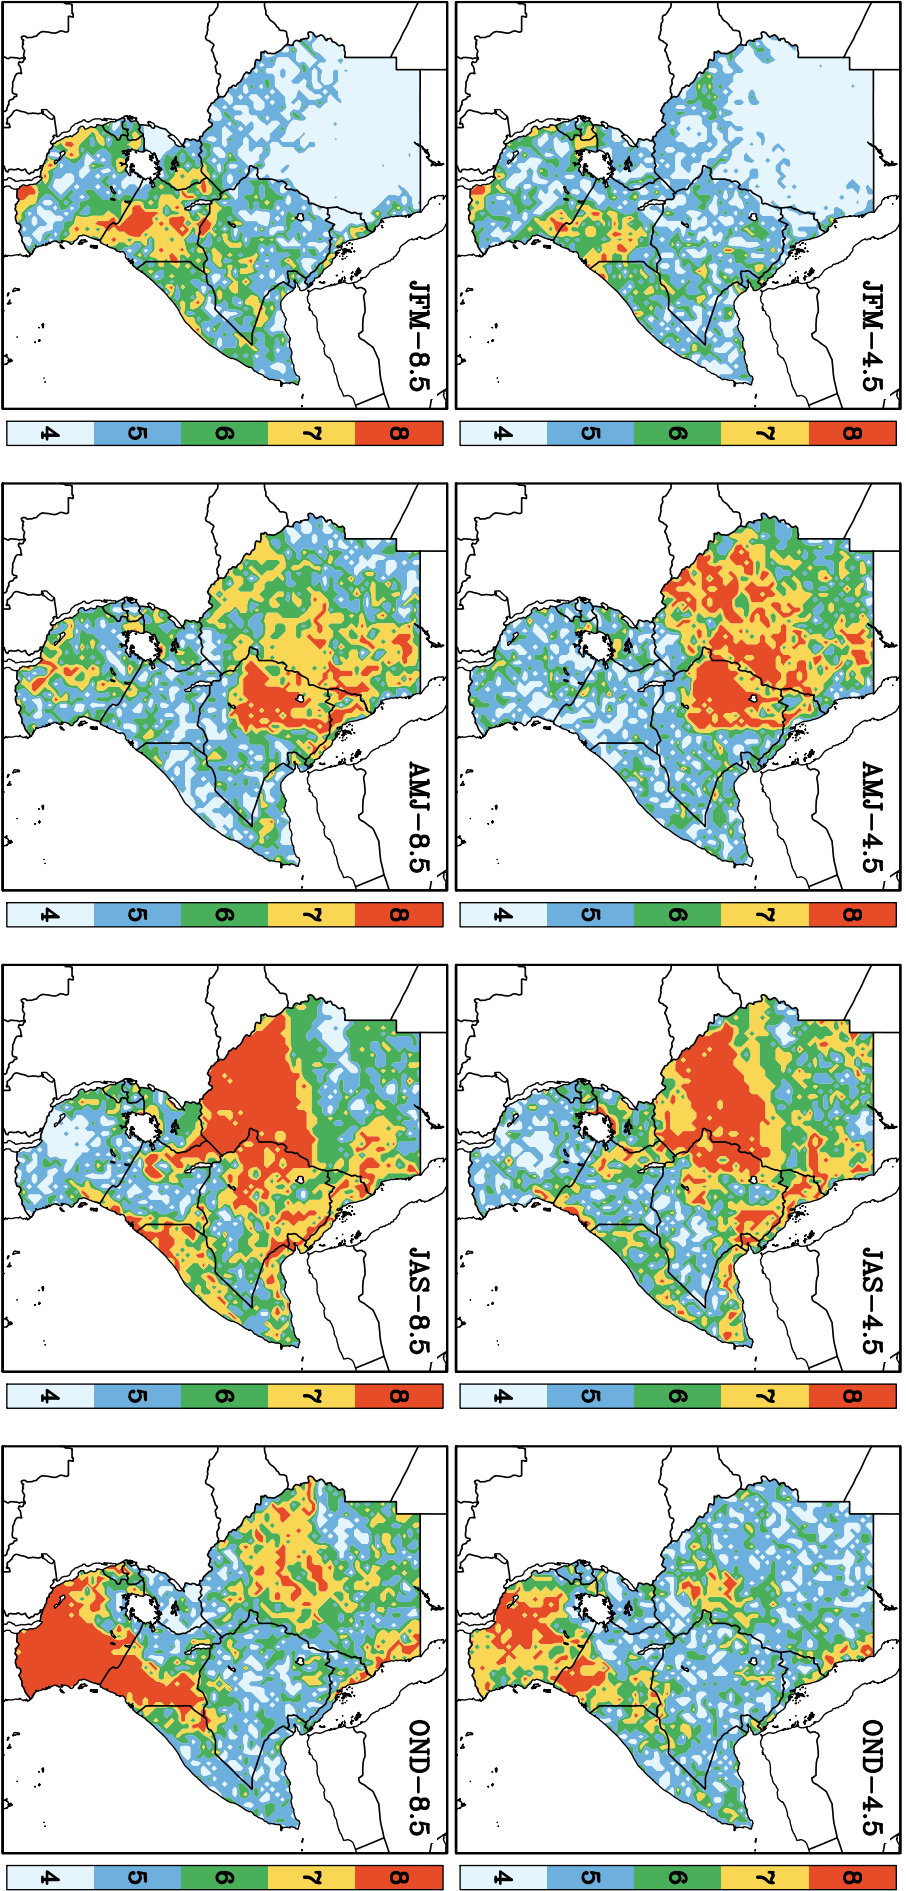

Supplement: s1 [file s1]



*atmosphere*

Supplement: s1 [file s1]

1 3 5 7 9 11 13

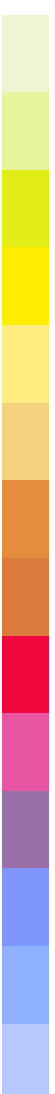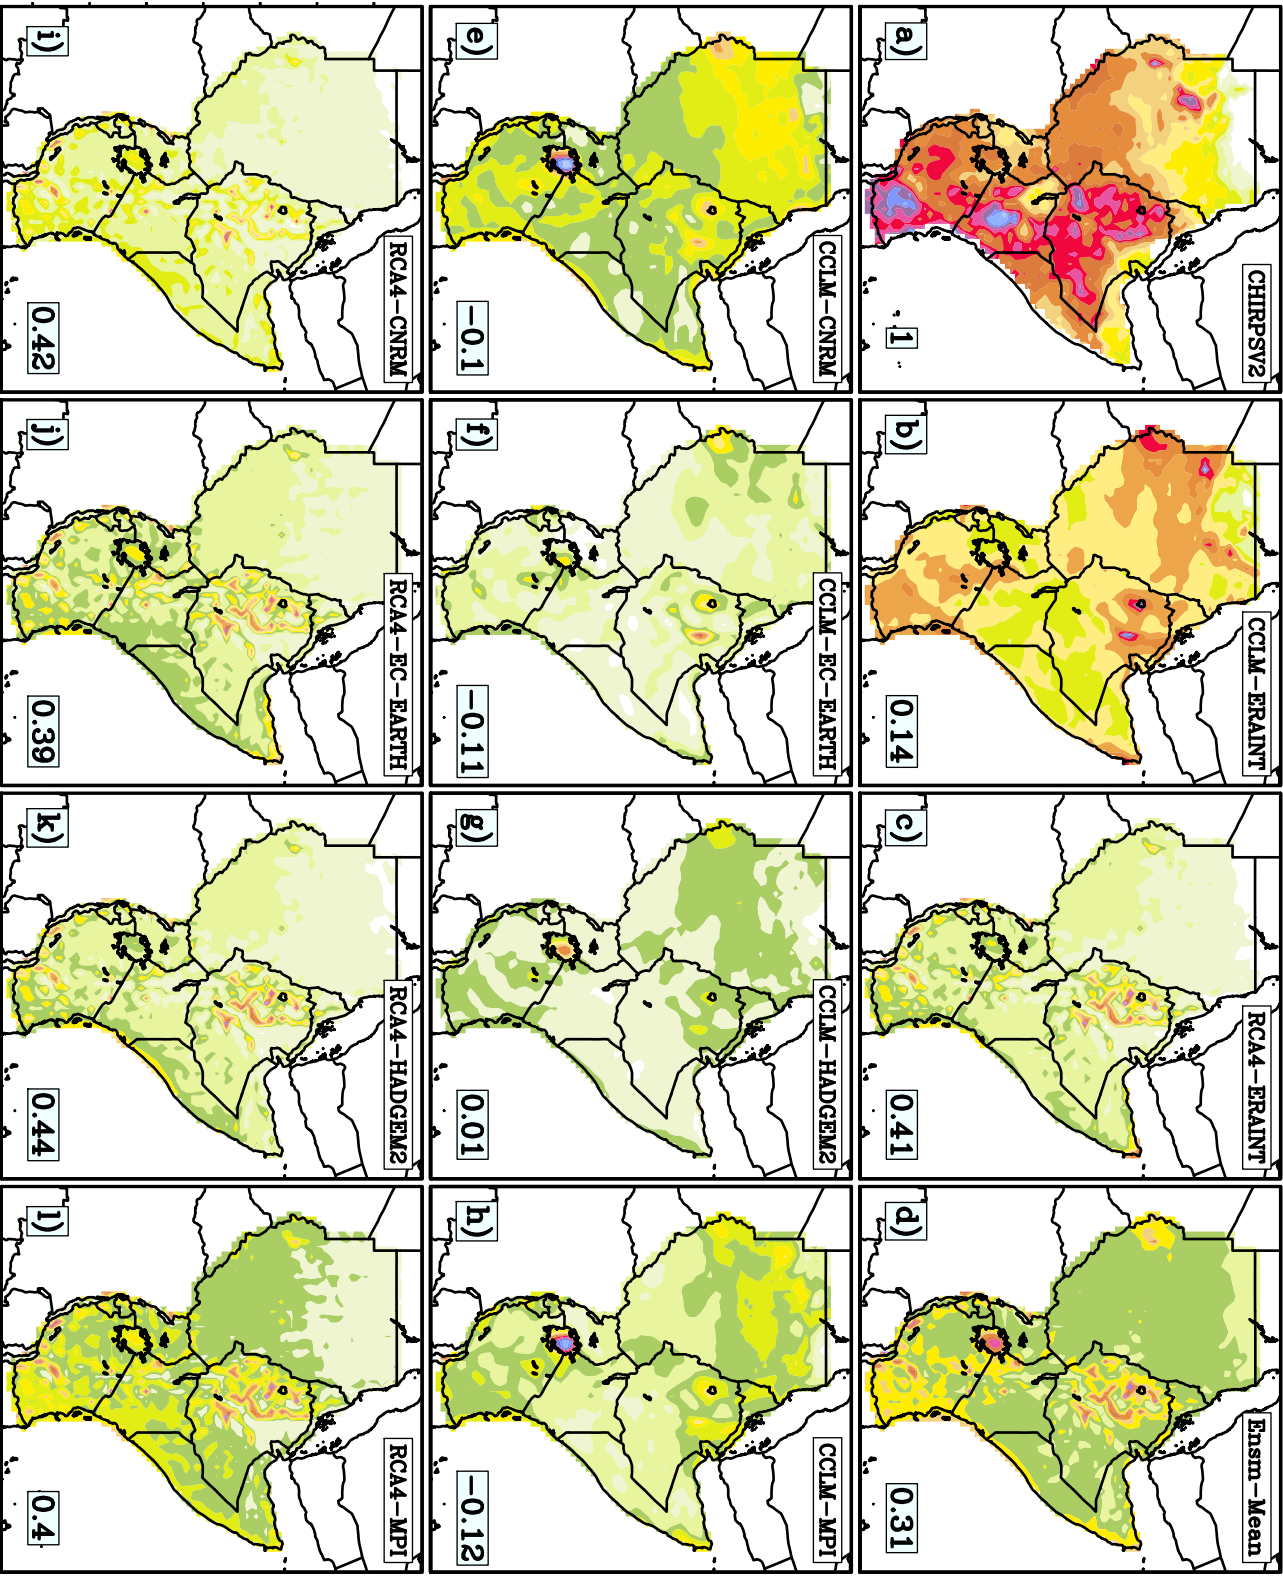

Supplement: s1 [file s1]

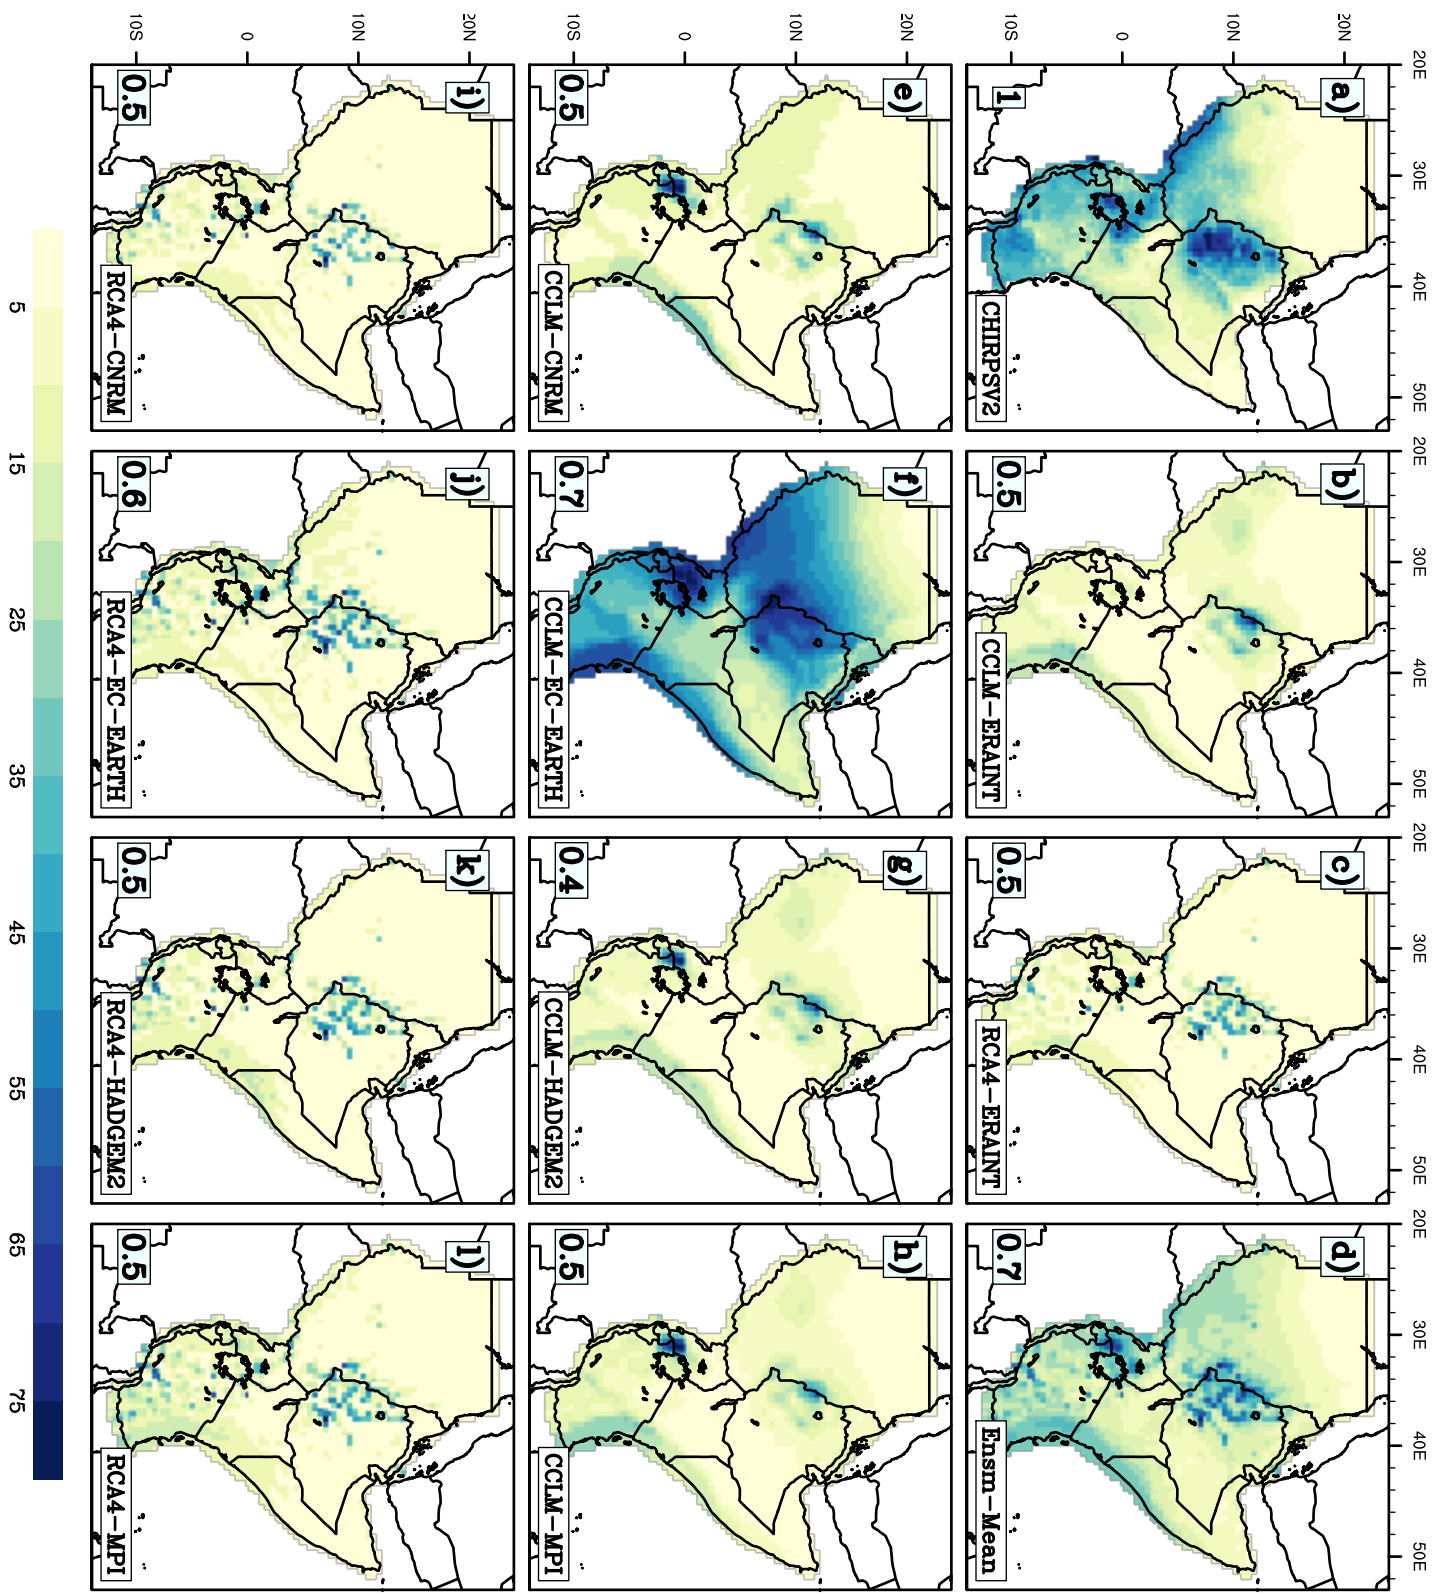

Supplement: s1 [file s1]

Member Agreement on sign of r10mm change

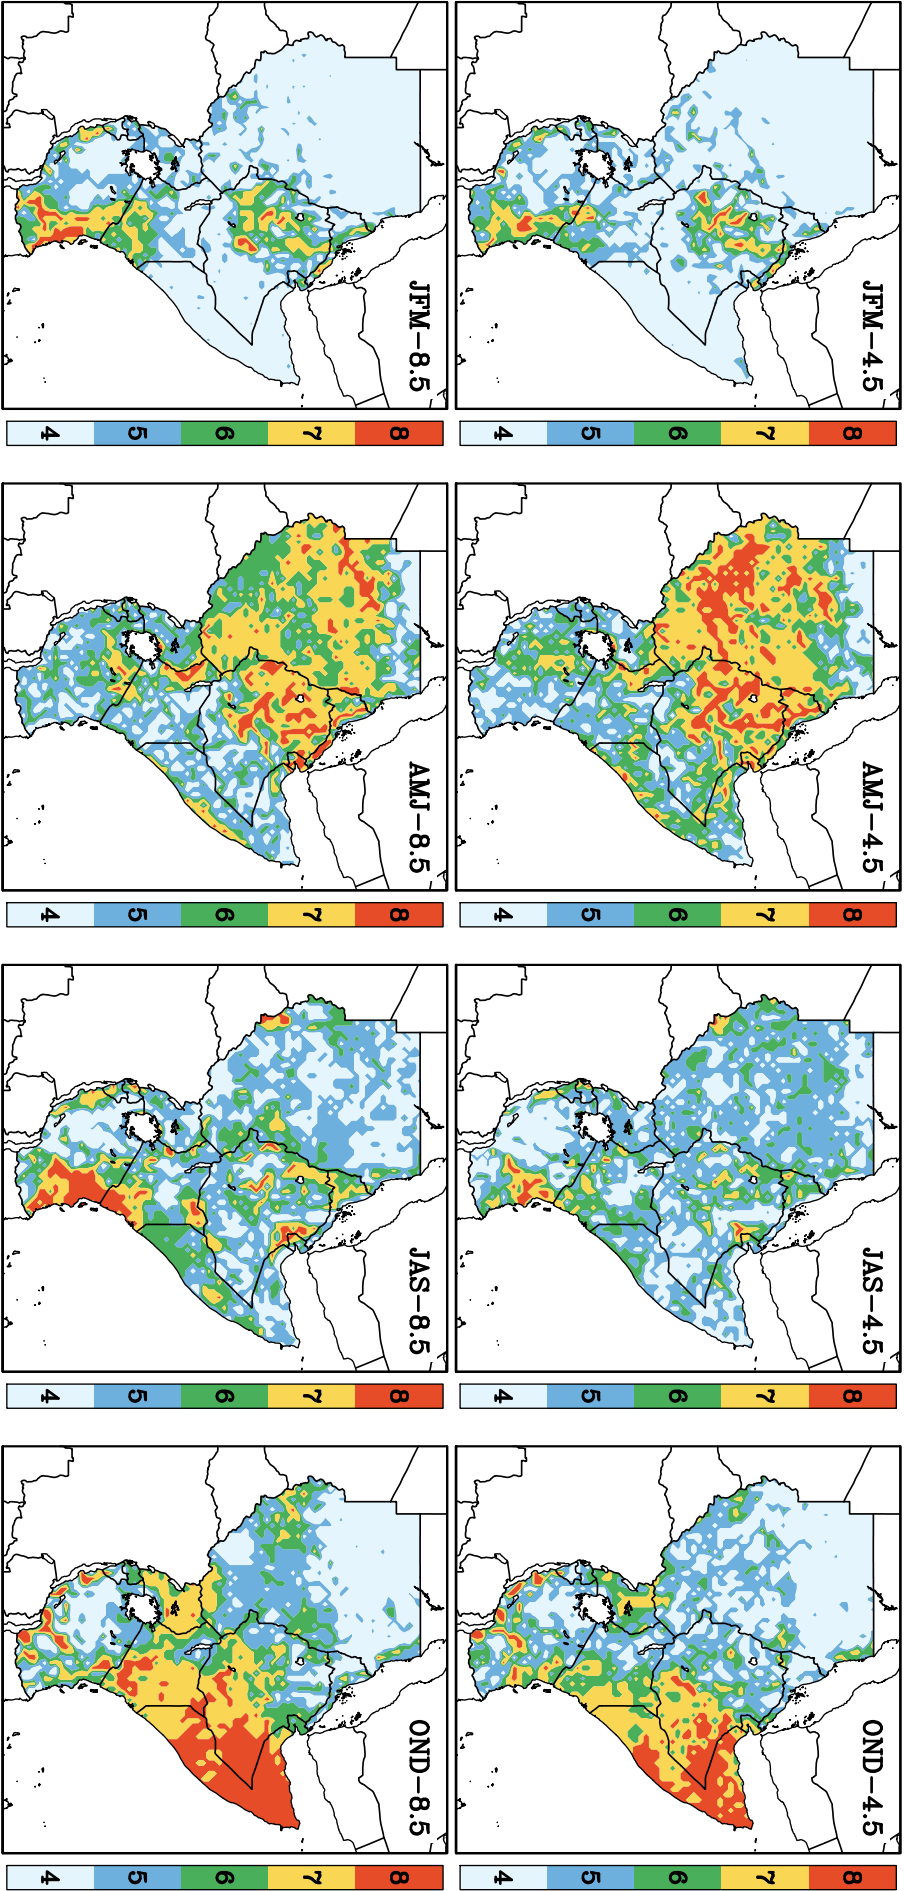

Supplement: s1 [file s1]

Ensemble Member Agreement: sign(+/-) % change in PRCPTOT

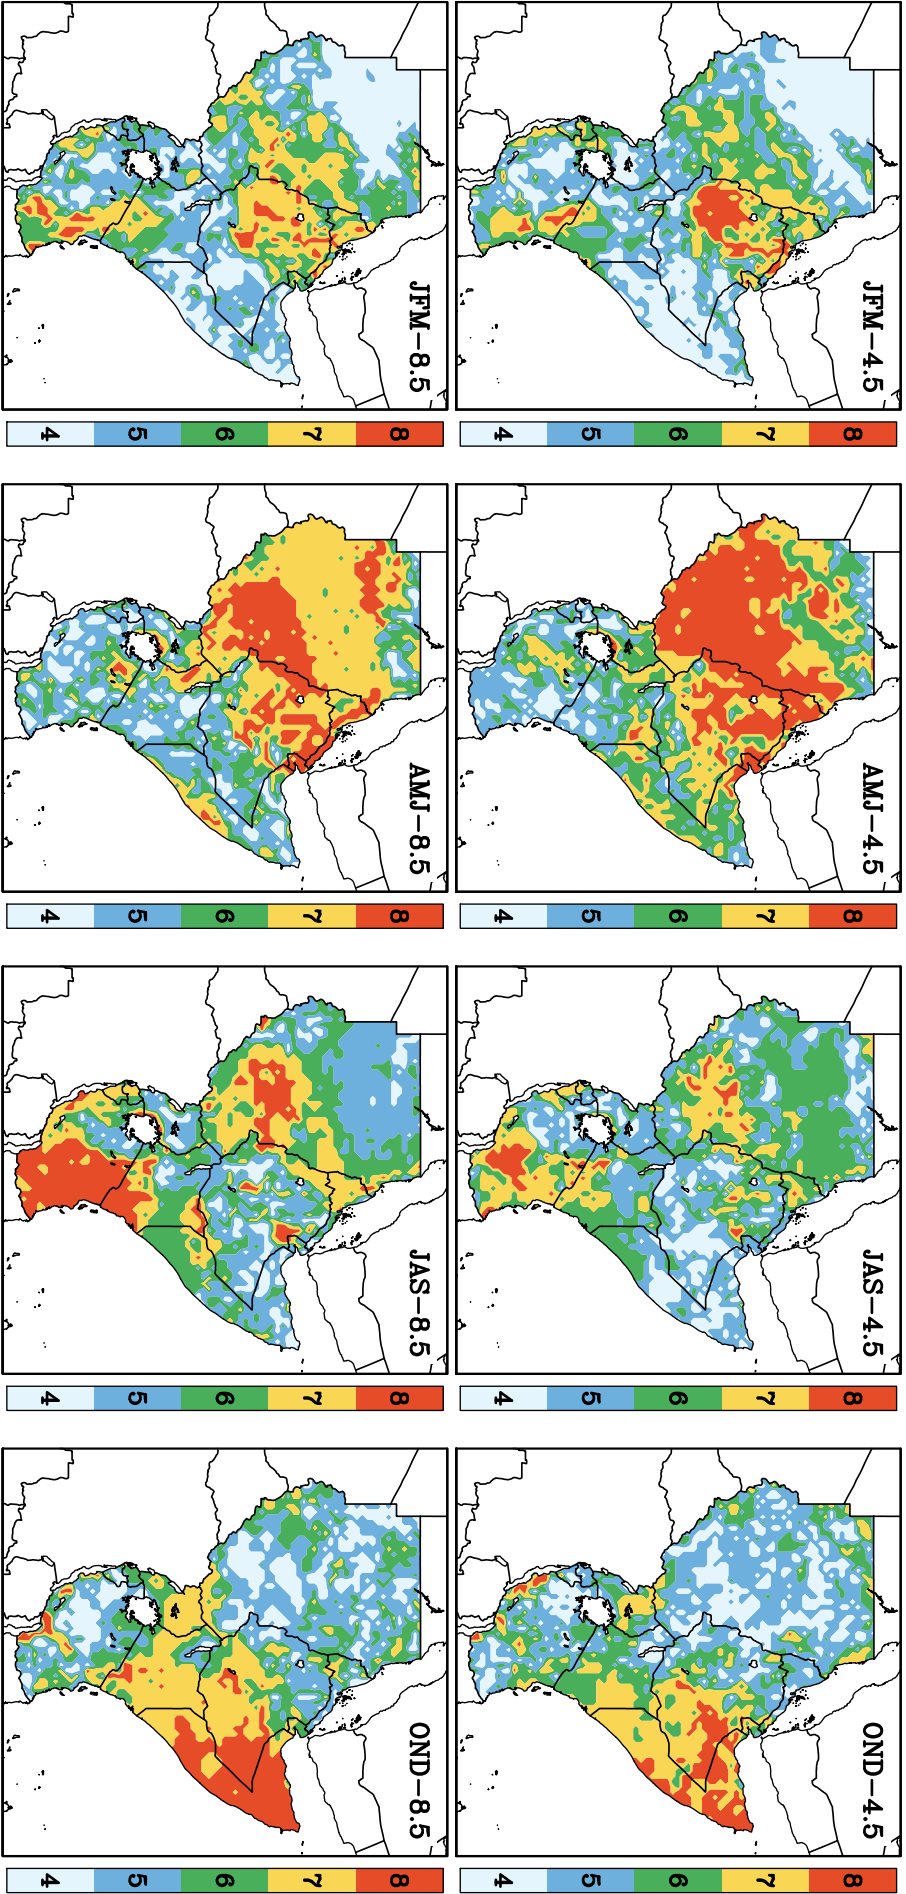

Supplement: s1 [file s1]

Interquartile Range: % change in rx1day

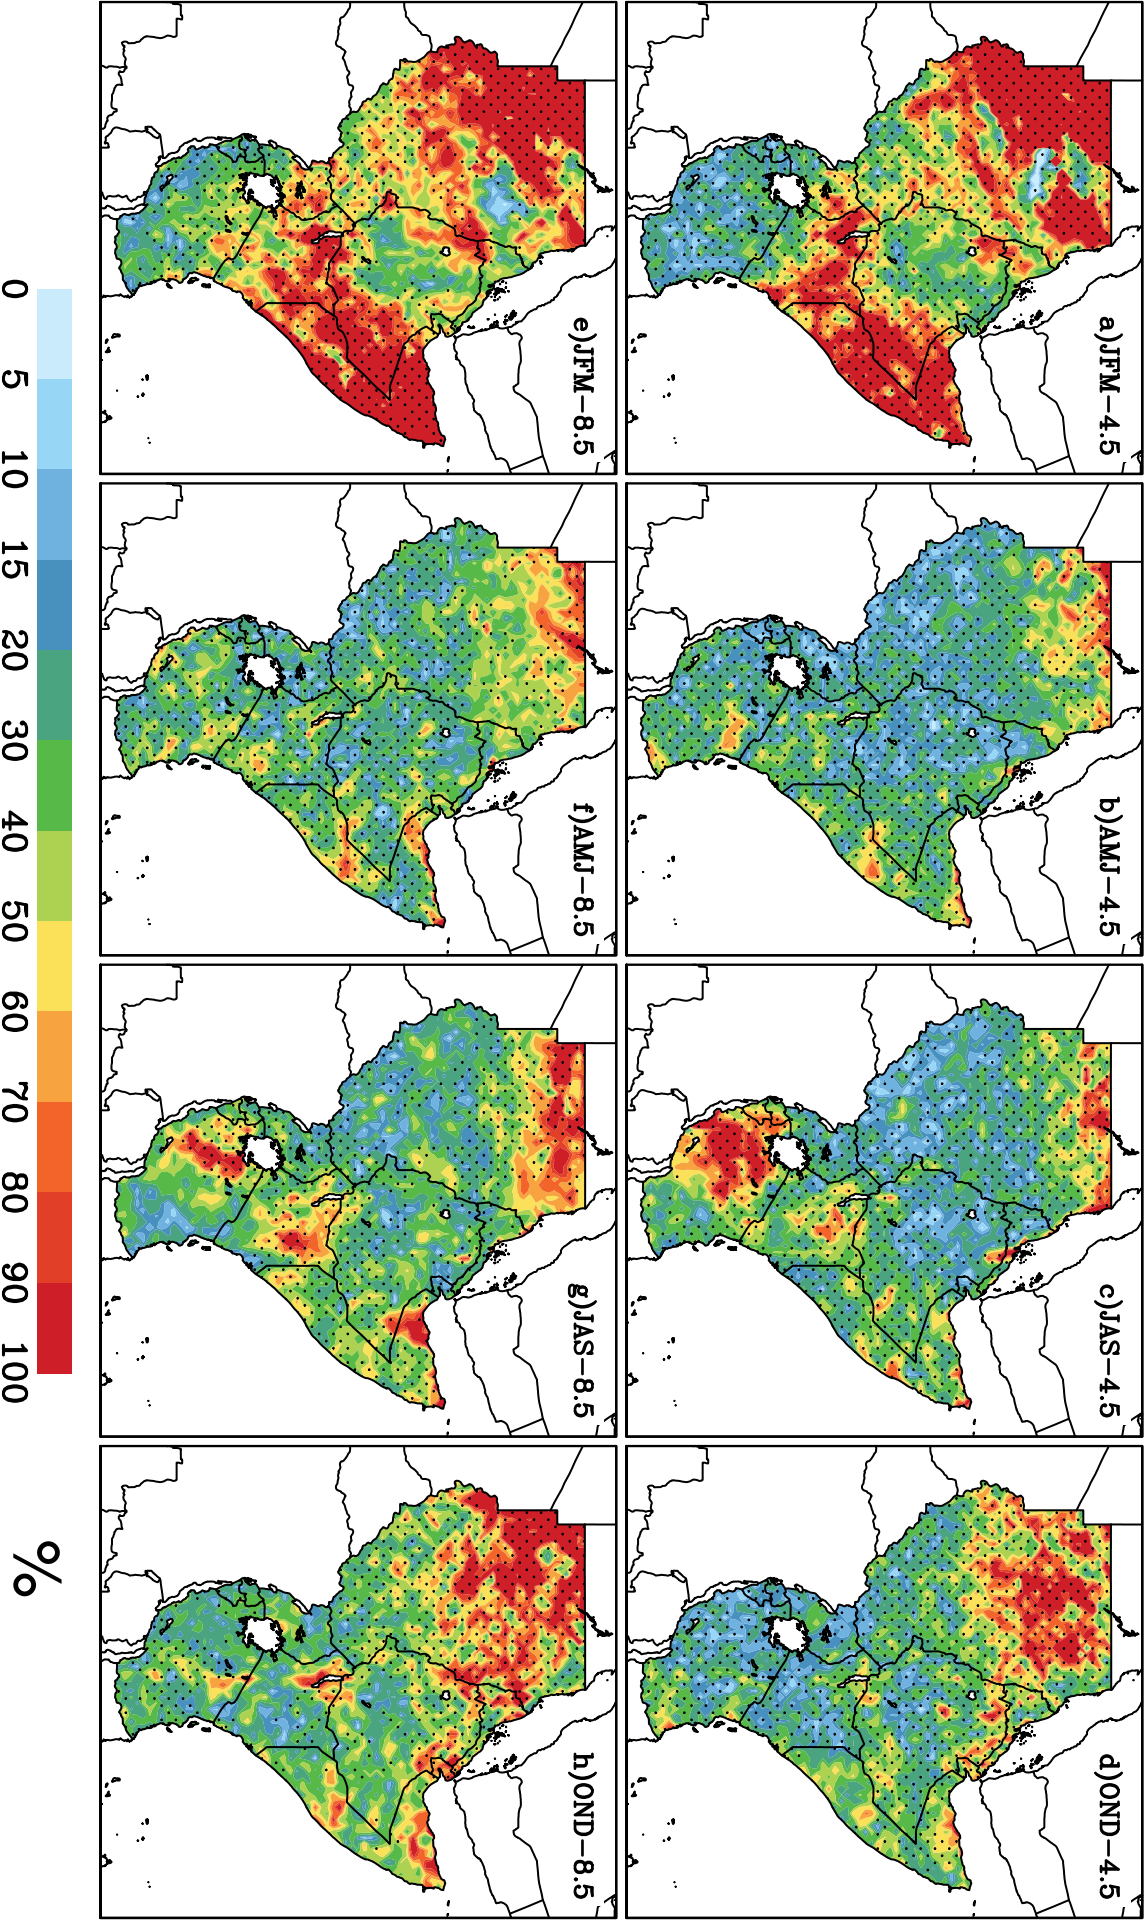

Supplement: s1 [file s1]

Interquartile Range: % change in PRCPTOT

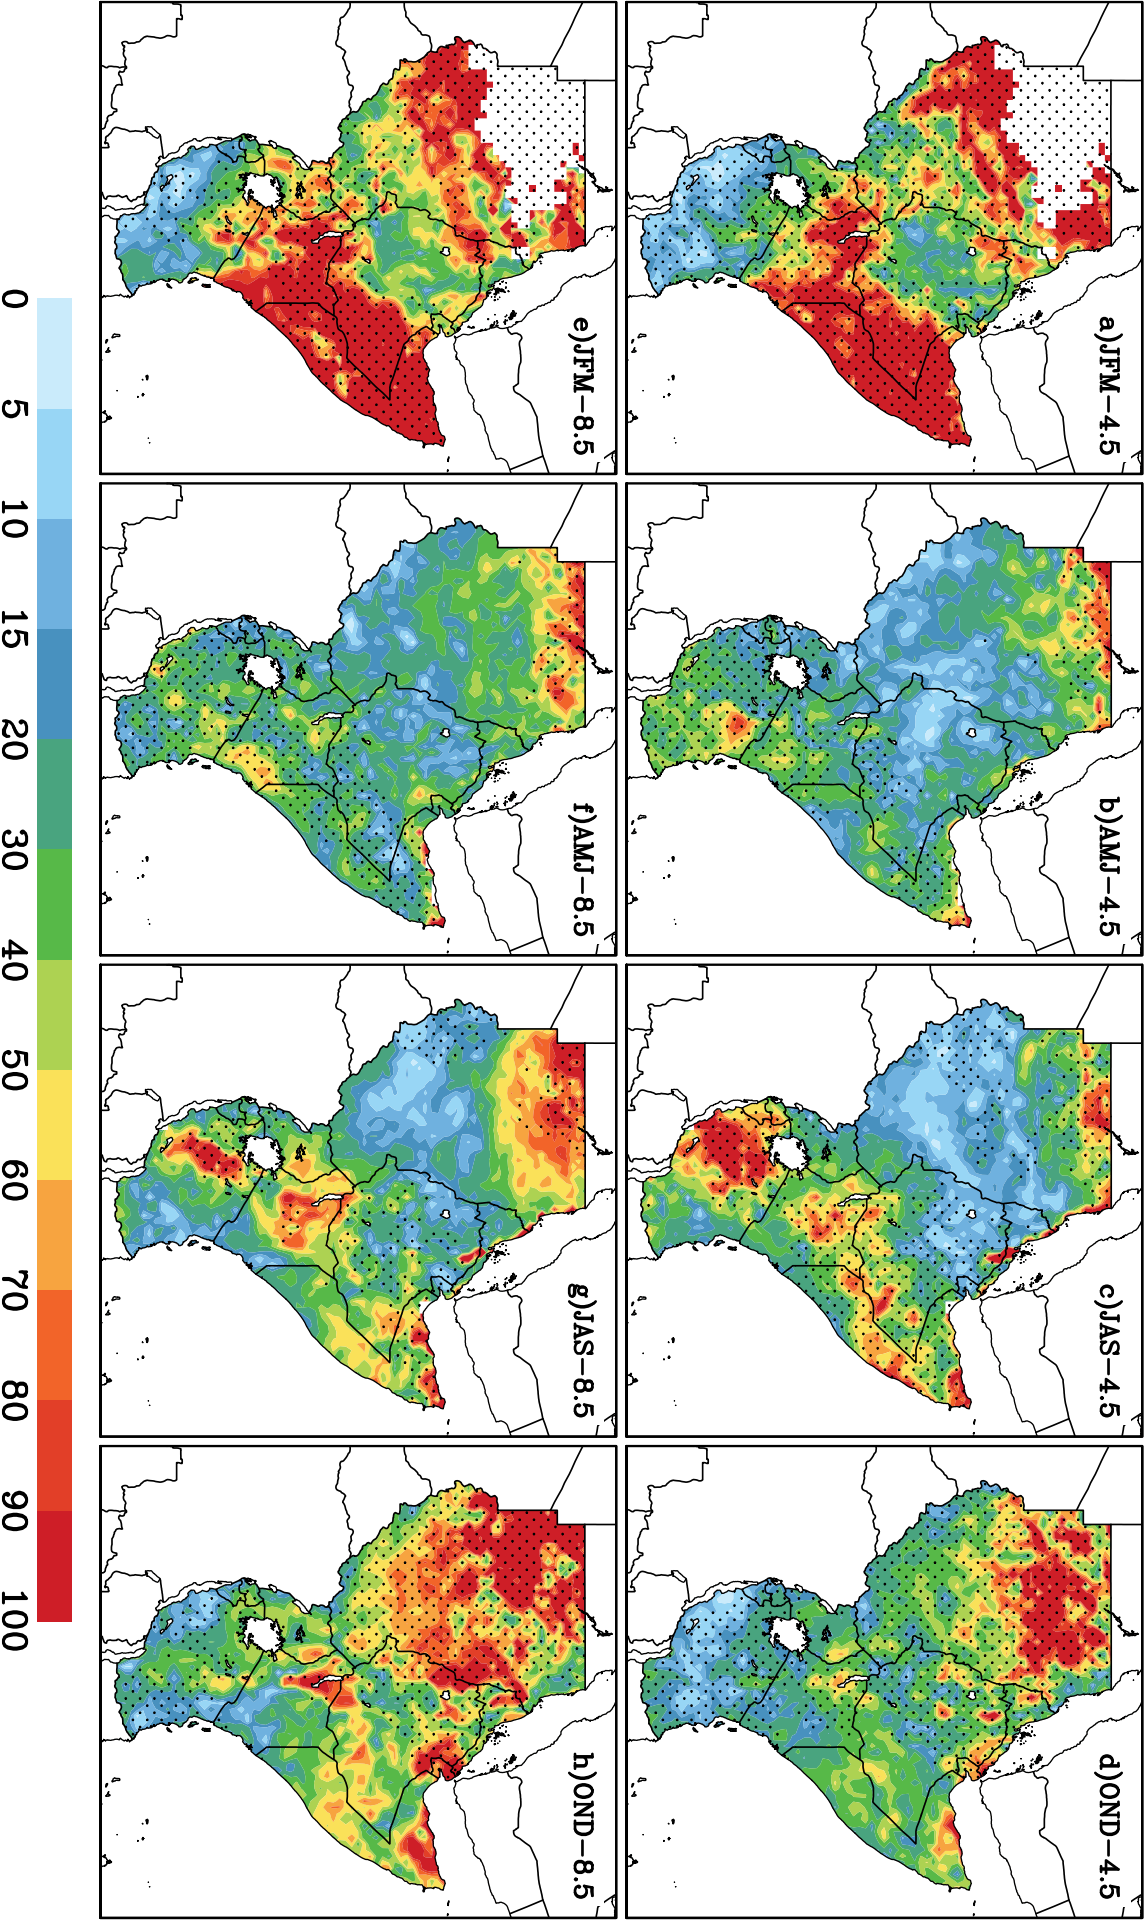

Supplement: s1 [file s1]

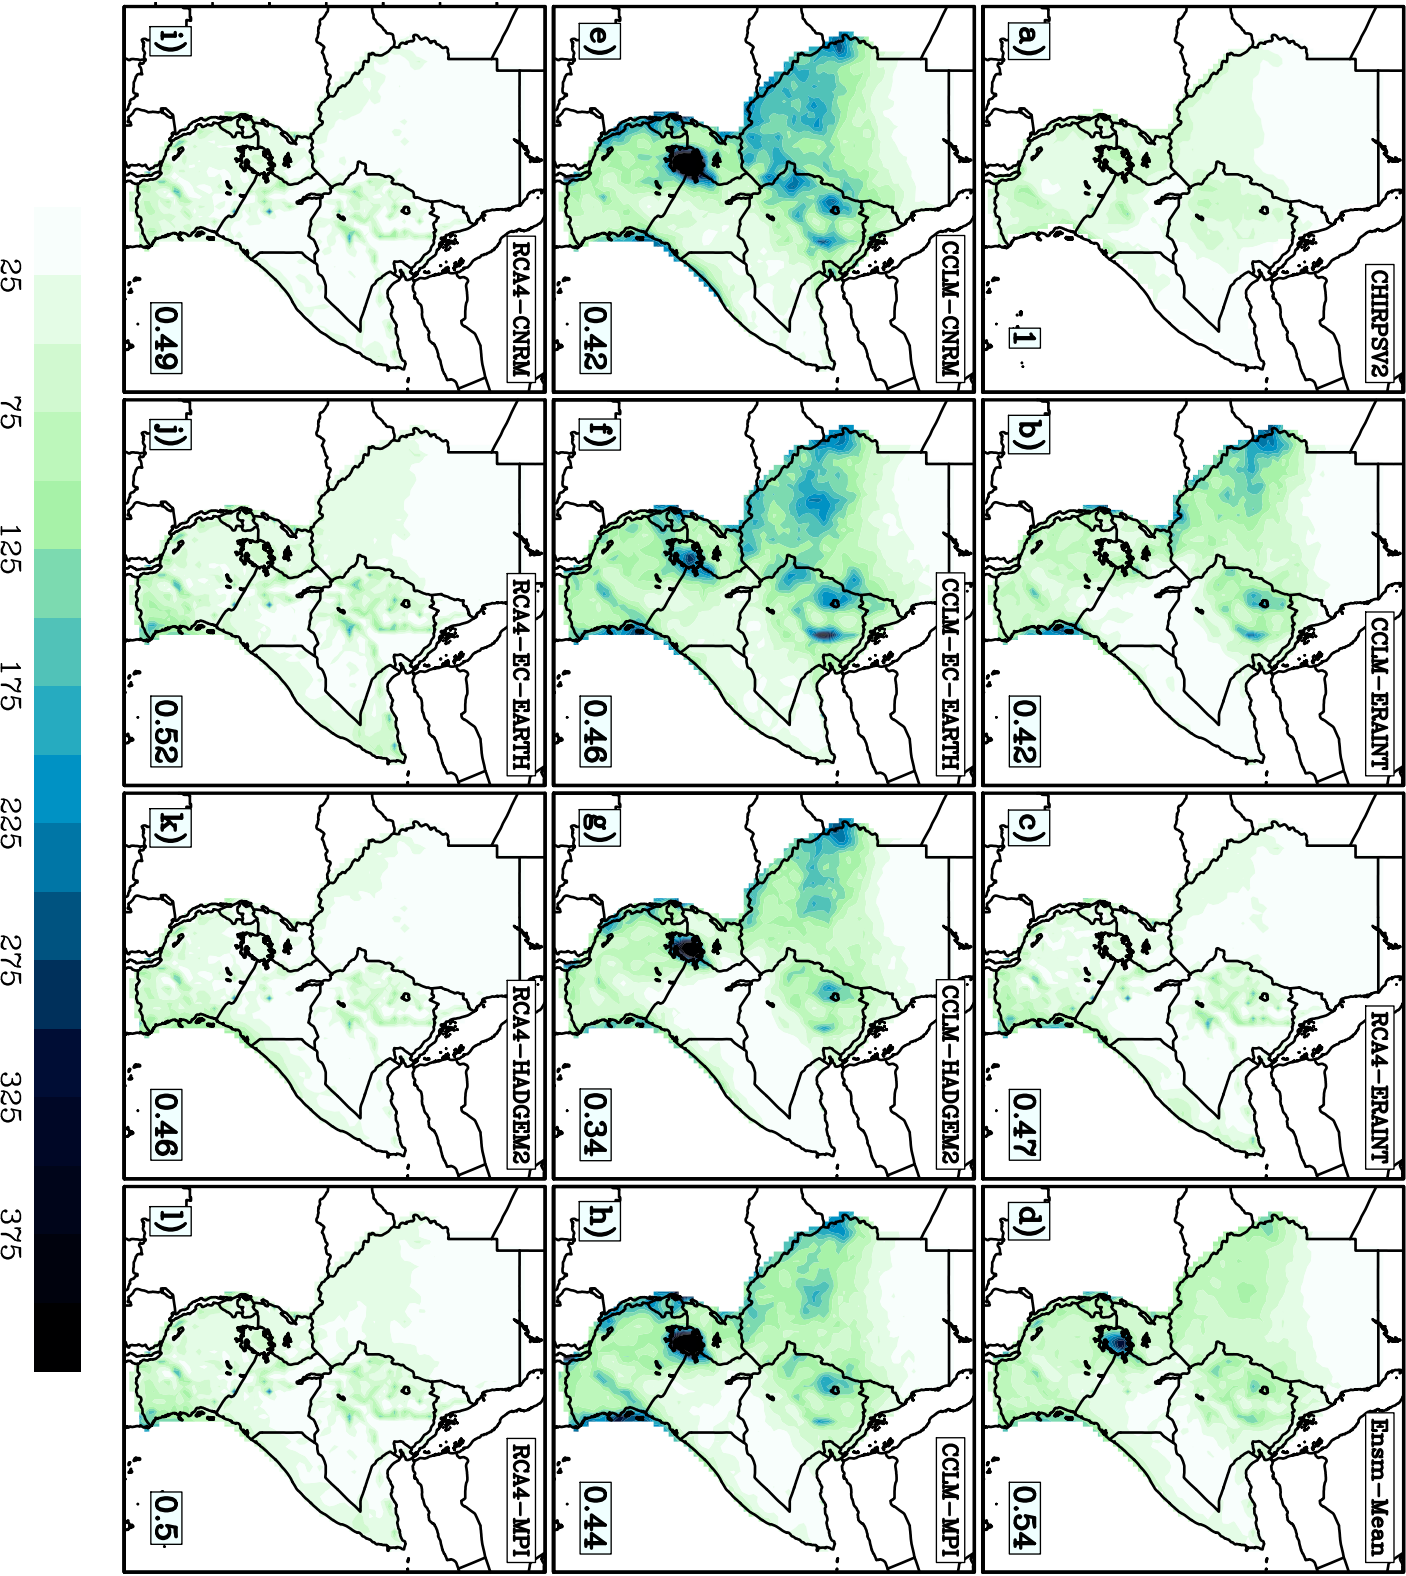

Supplement: s1 [file s1]

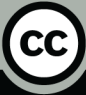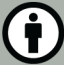

BY

Supplement: s1 [file s1]

Ensemble Member Agreement: sign(+/-) % change in RX1DAY

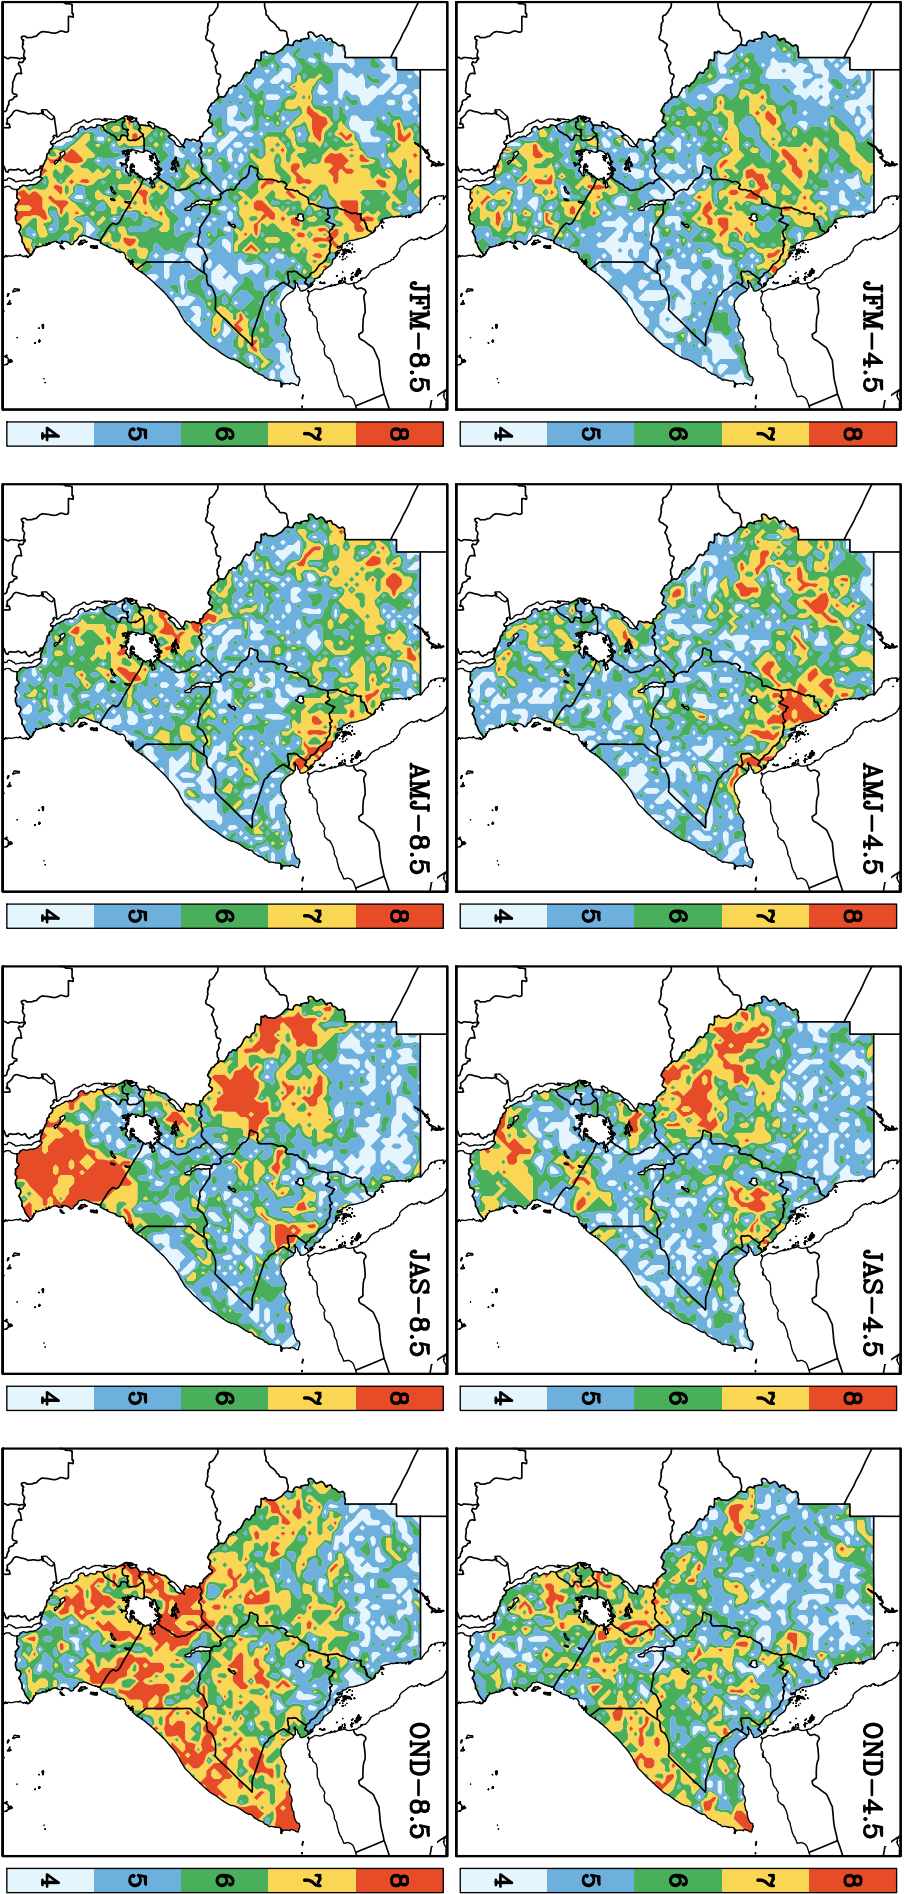

Supplement: s1 [file s1]

Interquartile Range: % change in r10mm

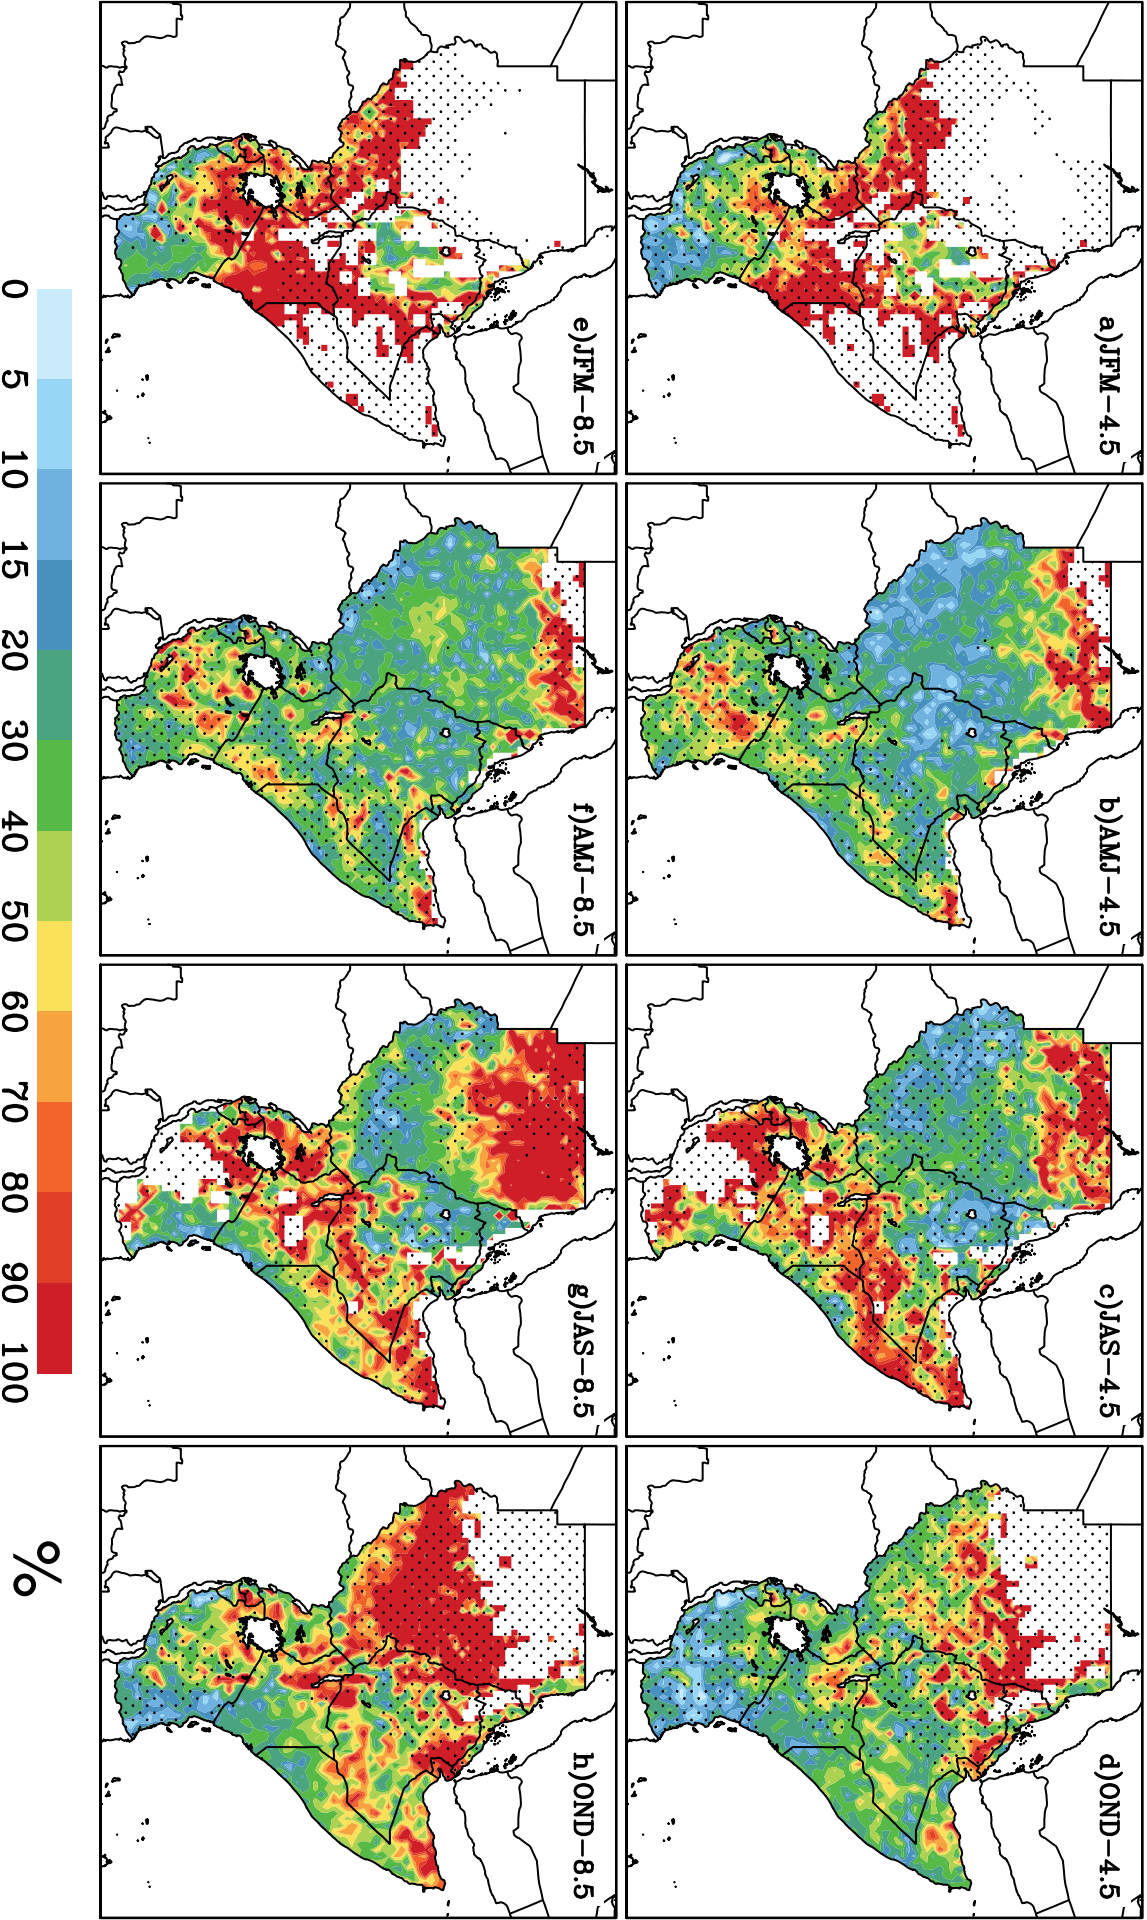

Supplement: s1 [file s1]

Ensemble Member Agreement: sign(+/-) % change in r95pe

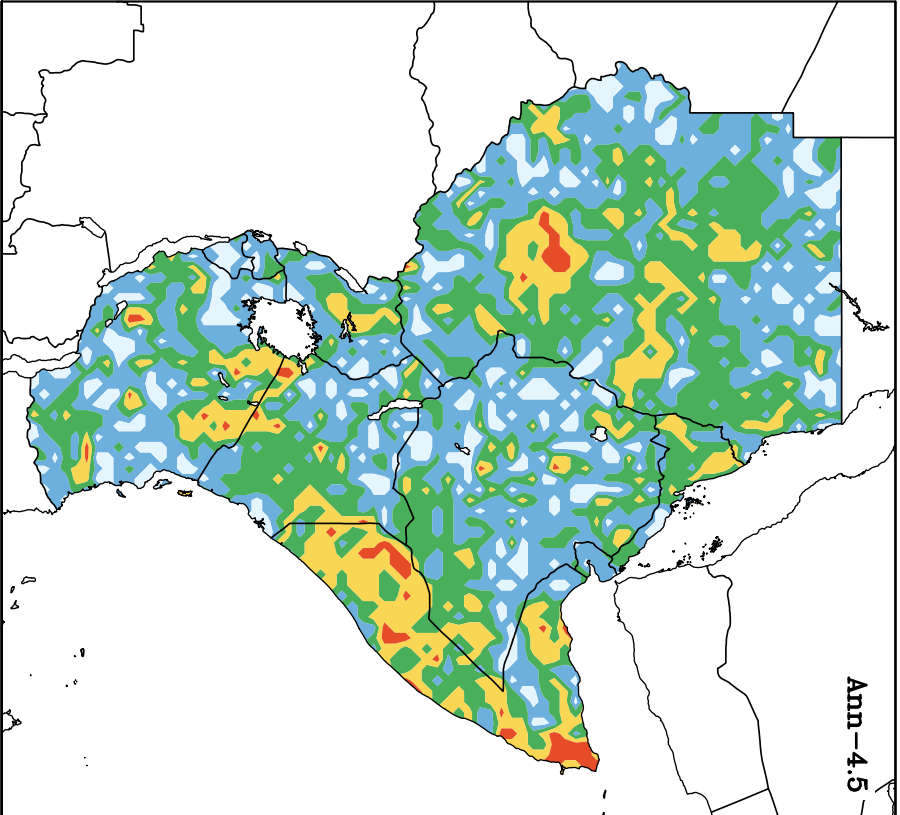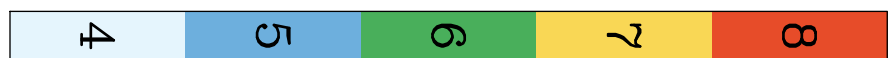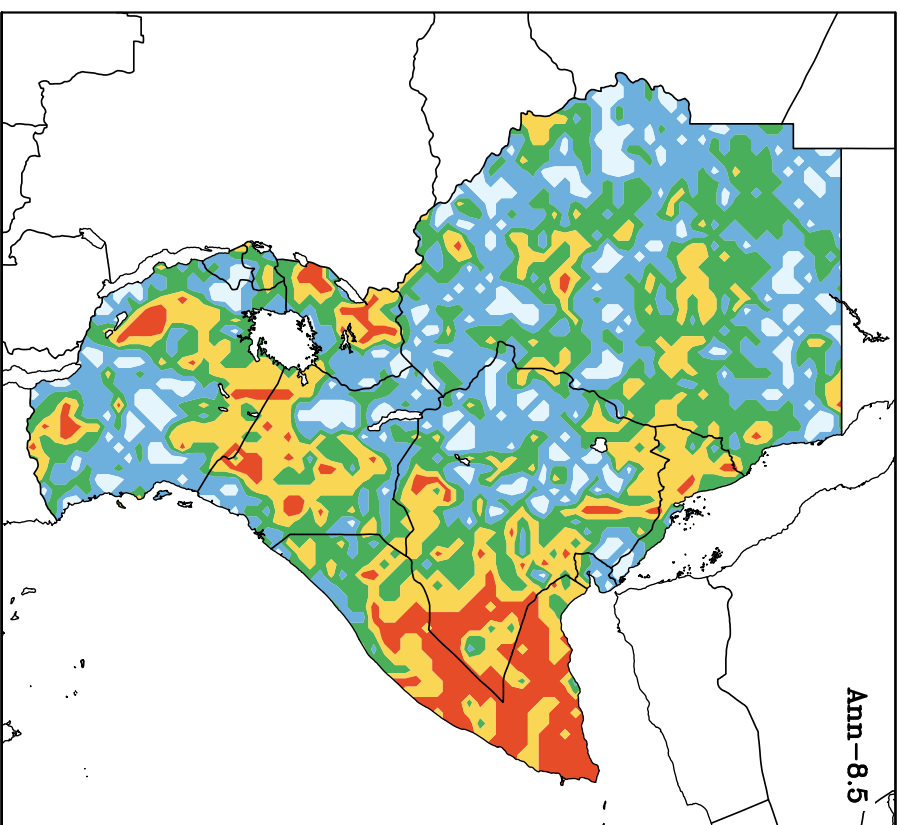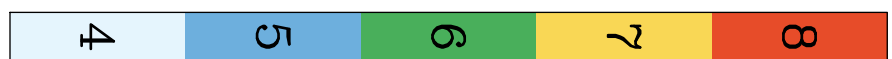

Supplement: s1 [file s1]

100 500 900 1300 1700 2100 2500 2900

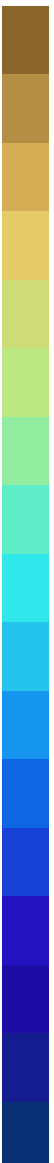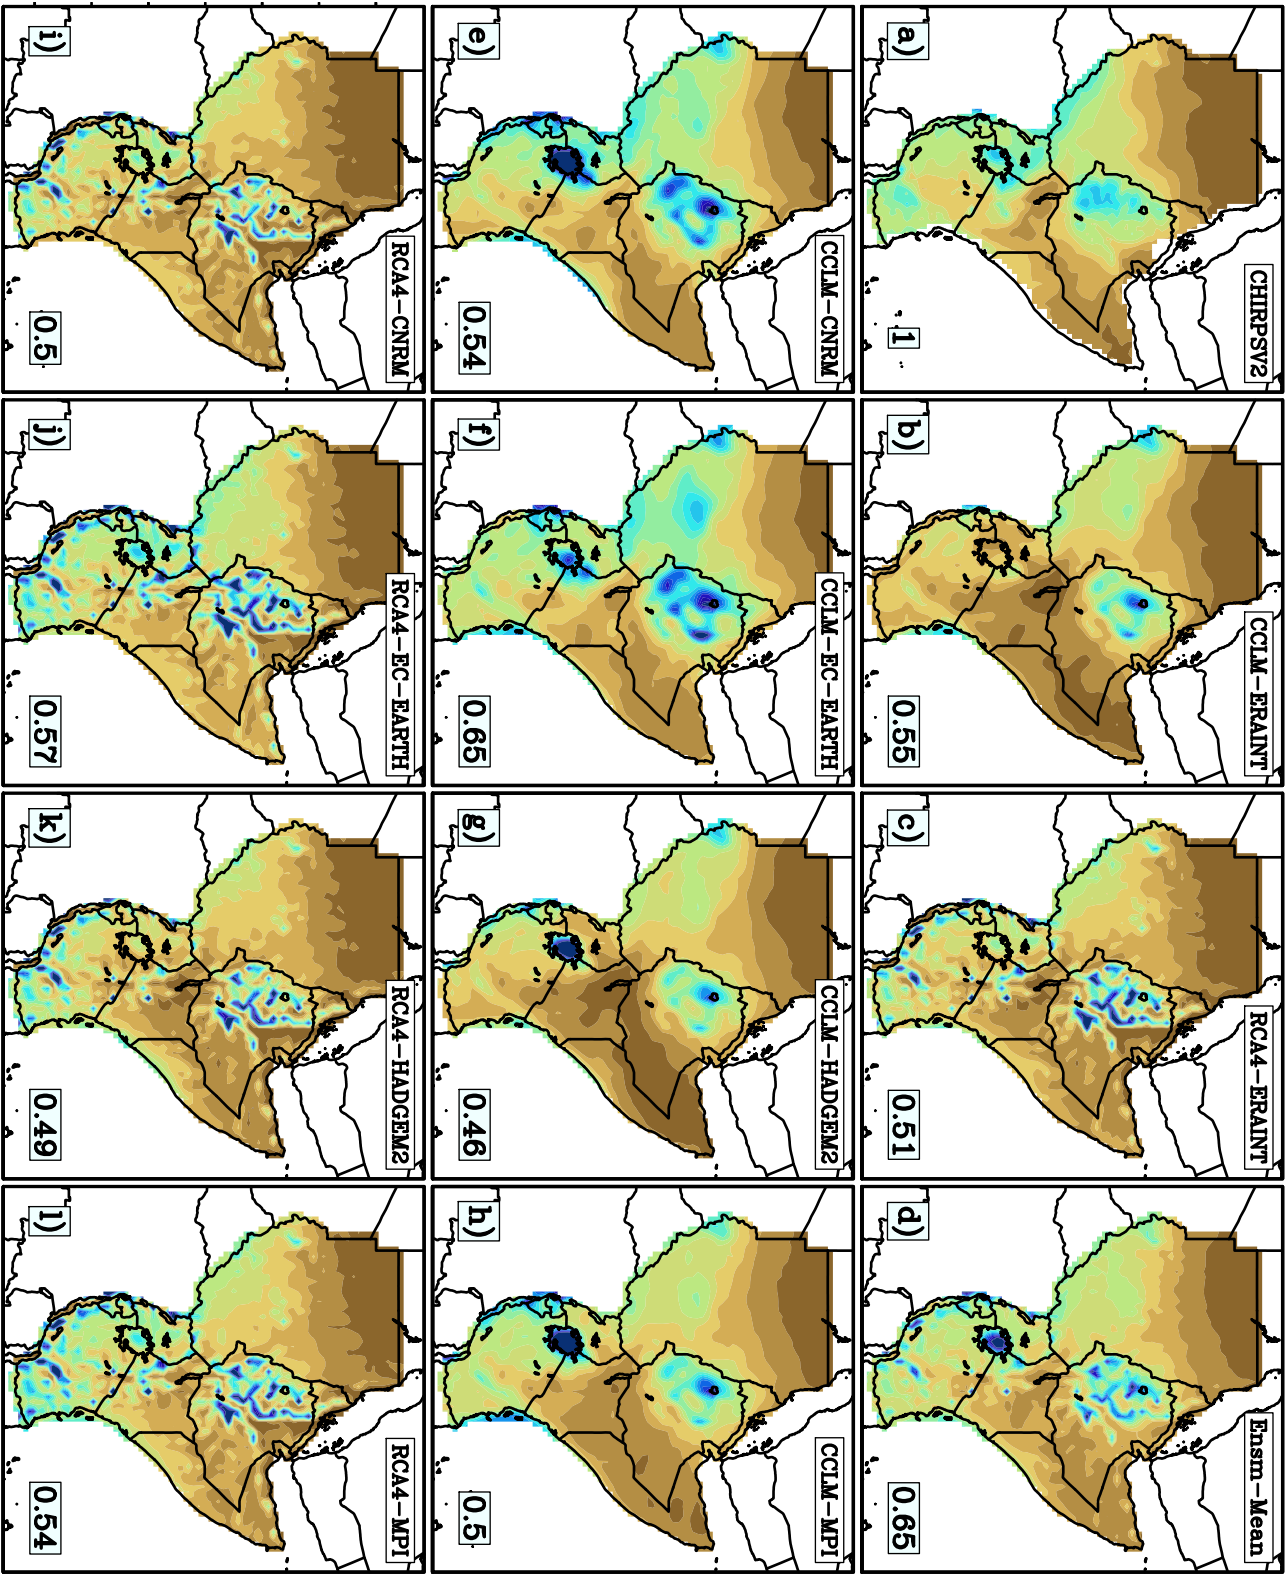

Supplement: s1 [file s1]
